1 Sexual maturation and embryonic development in octopus: use of  
2 energy and antioxidant defence mechanisms using *Octopus mimus*  
3 as a model.

4 Alberto Olivares<sup>1</sup>, Gabriela Rodríguez-Fuentes<sup>2</sup>, Maite Mascaró<sup>3,4</sup>, Ariadna  
5 Sánchez<sup>3</sup>, Karen Ortega<sup>5</sup>, Claudia Caamal-Monsreal<sup>3,4</sup>, Nelly Tremblay<sup>6</sup> and  
6 Carlos Rosas<sup>3,4</sup>

7

8 1. Departamento de Biotecnología, Facultad de Ciencias del Mar y recursos  
9 Biológicos, Universidad de Antofagasta, Antofagasta, Chile

10 2. Unidad de Química en Sisal, Facultad de Química, Universidad Nacional  
11 Autónoma de México, Puerto de abrigo s/n, Sisal, Yucatán

12 3. Unidad Multidisciplinaria de Docencia e Investigación, Facultad de Ciencias,  
13 Universidad Nacional Autónoma de México, Puerto de abrigo s/n, Sisal,  
14 Yucatán

15 4. Laboratorio Nacional de Resiliencia Costera (LANRESC), UNAM-CONACYT,  
16 México

17 5. Posgrado en Ciencias del Mar y Limnología sede Facultad de Ciencias,  
18 Universidad Nacional Autónoma de México, Puerto de abrigo s/n, Sisal,  
19 Yucatán

20 6. Alfred-Wegener-Institut Helmholtz-Zentrum für Polar- und Meeresforschung,  
21 Biologische Anstalt Helgoland, Postfach 180, D-27483 Helgoland, Germany

22

23 Corresponding author: Carlos Rosas: [crv@ciencias.unam.mx](mailto:crv@ciencias.unam.mx)

24 Short title: Biochemical dynamics of octopus

25 Abstract

26 Sexual maturation and reproduction influence the status of a number of  
27 physiological processes and consequently the ecology and behaviour of  
28 cephalopods. Using *Octopus mimus* as model species, the present study  
29 examined the changes in biochemical composition that take place during  
30 gonadal maturation of octopus females and its consequences in embryo and  
31 hatchlings characteristics, including energetic metabolites, digestive enzymes  
32 and antioxidant defence mechanisms. A total of 32 *Octopus mimus* adult  
33 females were sampled during ovarian maturation; biochemical composition  
34 (metabolites and digestive enzymes) of digestive gland (DG) and ovaries (only

35 metabolites) were followed during physiological and functional maturation.  
36 Levels of protein (Prot), triacyl glycerol (TG), cholesterol (Chol), glucose (Glu)  
37 and glycogen (Gly) were evaluated. The activity of alkaline and acidic enzymes  
38 also was measured in DG. Simultaneously, groups of eggs coming from mature  
39 females were sampled along development, and metabolites (Prot, TG, Glu, Gly,  
40 TG, Chol), digestive enzymes activity (Lipases, alkaline and acidic), antioxidant  
41 defence mechanisms and radical oxygen species (ROS) were evaluated. This  
42 study shows that ovarium is a site for reserve of some nutrients for  
43 reproduction. Presumably, TG where stored at the beginning of the maturation  
44 processes followed by Chol, both at the same time were energetically supported  
45 by Glu, derived from Gly following gluconeogenic pathways. Nutrients and  
46 enzymes (metabolic, digestive and REDOX system) where maintained without  
47 significant changes and in a low activity during organogenesis. Our findings  
48 suggest that activity was not energetically costly; in contrast, during the embryo  
49 growth there was mobilization of nutrients and activation of the metabolic and  
50 digestive enzymes. Increments in consumption of yolk and glycogen, and  
51 reduction in molecules associated with oxidative stress allowed paralarvae to  
52 hatch with the antioxidant defence mechanisms ready to support ROS  
53 production.

54

55 Keywords: Metabolites, Cephalopods, *Octopus mimus*, Reproduction, Embryo  
56 development

57

58 Introduction

59 Sexual maturation and reproduction influence the status of a number of  
60 physiological processes and consequently animal ecology and behaviour  
61 (Zamora & Olivares 2004). Studies on *Octopus vulgaris*, *O. defilippi* (Rosa et al.  
62 2004) and on the Ommastrephid squids *Illex coindetii* and *Todaropsis eblanae*  
63 (Rosa et al. 2005) suggest that those species take the energy for egg  
64 production directly from food rather than from stored products in digestive  
65 glands or muscle, demonstrating the importance of trophic ecology for  
66 reproduction in those species. Laboratory studies have confirmed that the type  
67 of food has a strong influence in the biochemical characteristics of octopus  
68 eggs, embryos and hatchlings. The type of diet (fresh or formulated) during *O.*

69 *maya* female reproduction has an effect on biochemical and morphological  
70 characteristics of embryos and hatchlings (Caamal-Monsreal et al. 2015;  
71 Tercero-Iglesias et al. 2015). *Octopus maya* females fed with mixed diets  
72 produced yolk of higher quality, allowing hatchlings a better performance during  
73 the first days of culture compared with hatchlings from females fed with mono-  
74 diet. In addition, nutrition influences the health condition of *O. maya* females  
75 and determined the capacity of the animals to maintain their physiological  
76 integrity during the post-spawning period (Caamal-Monsreal et al. 2015;  
77 Tercero-Iglesias et al. 2015), when females require enough energy to protect  
78 the spawn during the embryo development (Roumbedakis et al. 2017). A mixed  
79 maternal diet resulted in more hatchlings from *O. vulgaris* females than from  
80 females fed with mono-diet (only crabs) (Márquez et al. 2013). This finding  
81 suggests that the relationship between the nutrients of the diet (AAs and FAs),  
82 metabolic pathways and embryo characteristics previously observed in *O. maya*  
83 (Caamal-Monsreal et al., 2017) may operate similarly in other octopus species.  
84 Despite the recent advances on the importance of the type of food on embryos  
85 and hatchlings characteristics, there is no information on the biochemical  
86 dynamics associated with the processing of nutrients during the maturation of  
87 females, how nutrients are stored in eggs and used by embryos for their  
88 development. There are physiological changes during octopus embryo  
89 development associated with the use of nutrients stored in yolk to synthesize  
90 organs and tissues. Caamal-Monsreal et al., (2016) and Sánchez-García et al.,  
91 (2017) showed that from stage XV onwards the yolk consumption of *O. maya*  
92 embryos was significantly higher than observed in previous stages. This  
93 suggests that embryo metabolism is accelerated at stage XV to stimulate the  
94 growth of embryos after organogenesis. From stage XV joint with energetic  
95 metabolism, there is an increment in the activity of catabolic enzymes that  
96 transform yolk in molecules that are physiologically useful for embryos (Caamal-  
97 Monsreal et al. 2016). That mobilization of reserves causes, on the one hand,  
98 an increment in oxygen consumption with consequences in energy production.  
99 On the other hand, it causes the production of radical oxygen species (ROS)  
100 due to the increment of metabolic rate (Repolho et al. 2014; Sánchez-García et  
101 al. 2017). Octopus embryos are not capable of eliminating ROS efficiently when  
102 exposed to thermal changes (Repolho et al. 2014; Sánchez-García et al. 2017).

103 However, there is no information on the relationship between the use of yolk  
104 reserves, the antioxidant defence mechanisms, and ROS production during  
105 octopus embryos development.

106

107 *Octopus mimus* is one of the most important species of octopus in the Pacific  
108 Ocean further South of Ecuador. This species inhabits off northern Peru to San  
109 Vicente bay in Chile, where it sustains important artisanal benthic fisheries  
110 grounds in both countries (Cardoso et al. 2004; Cortez et al. 1999; Olivares et  
111 al. 1996). *Octopus mimus* reproduces throughout the year (Cardoso et al.,  
112 2004; Castro-Fuentes et al., 2002; Olivares et al., 1996). Egg laying by an  
113 individual can extend over 20 d, due to asynchrony in oocyte development and  
114 the loss of ovarian function due to their semelparous reproductive strategy  
115 (Zamora and Olivares, 2004). The time span of embryonic development  
116 changes with environmental temperature; for instance, it spans around 68 d at  
117 16 °C during winter, whereas it lasts between 38 and 43 d at 20 °C during  
118 summer (Castro-Fuentes et al., 2002; Warnke, 1999). The optimum  
119 temperature for *O. mimus* embryos in laboratory conditions is in the range of 15  
120 to 18°C (Uriarte et al. 2012), while one to three d old paralarvae have a thermal  
121 preference of 23 to 26°C (Zuñiga et al. 2013). There is a fair knowledge on  
122 production and rearing of *O. mimus* paralarvae in controlled conditions; for  
123 instance, environmental variables, type of tanks, light, diet (Cortez et al. 1995;  
124 Olivares et al. 1996; Zuñiga et al. 1995), histology, biochemistry and  
125 reproduction (Cortez et al. 1995; Olivares et al. 2017; Olivares et al. 2003;  
126 Olivares et al. 2001; Zamora & Olivares 2004). Recent studies have progressed  
127 on embryo development (Castro-Fuentes et al. 2002; Uriarte et al. 2012;  
128 Warnke 1999), thermal tolerance of paralarvae (Zuñiga et al. 2013), growth and  
129 nutrition (Baltazar et al. 2000; Carrasco & Guisado 2010; Gallardo et al. 2017),  
130 taxonomy and genetics (Perez-Losada et al. 2002; Söller et al. 2000). Those  
131 studies were stimulated due to the potential for aquaculture of *O. mimus* in  
132 Chile and to better understand the potential effects of environmental changes in  
133 the natural populations.

134

135 However, there is fragmented and dispersed information about the relationship  
136 between the physiological characteristics of cephalopod females, and the

137 physiology of embryos and hatchlings. This information will allow to establish a  
138 reference for comparison of physiological process that occurs from brood stock  
139 to the next generation. In this sense, the present study is focused in  
140 biochemical composition changes that take place during gonadal maturation of  
141 octopus females and its consequences in embryo and hatchlings  
142 characteristics, putting special attention to energetic metabolites, digestive  
143 enzymes and antioxidant defence mechanisms of *O. mimus*.

144

## 145 2. Material and methods

### 146 2.1. Animals

147 A total of 32 *O. mimus* females ( $1179 \pm 651$  g BW) were collected by scuba  
148 diving using the gear hook (the local method) at 1–5 m depth off the coast of  
149 Antofagasta, Chile ( $23^{\circ}38'39$  S,  $70^{\circ}24'39$  W). All captured females above these  
150 sizes were anatomically ready with a developed reproductive system (Zuñiga *et*  
151 *al.* 2014). This study was approved by the Animal Care committee of  
152 Universidad de Antofagasta, Chile and complied with the Experimental Animal  
153 Ethics Committee of the Faculty of Chemistry at Universidad Nacional  
154 Autónoma de México (Permit Number: Oficio/FQ/CICUAL/099/15).

155

### 156 2.2 Reproductive condition

157 In the laboratory 23 females were immersed in cold sea water ( $6-8^{\circ}\text{C}$ ) to induce  
158 loss of sensation and to enable humane killing (Andrews *et al.* 2013) as  
159 suggested for sub-tropical cephalopod species (Roper and Sweeney 1983). The  
160 organisms were dissected immediately after dormancy and four weights ( $\pm 0.001$   
161 g) were recorded per octopus: BW, g—total body weight; Ovw, g – ovarium  
162 weight; RSW—reproductive system weight, identified as Ovarium with oviducts  
163 and oviducal glands; and DG, g - digestive gland weight (g). Eviscerated wet  
164 weight was measured, and DG and ovarium samples were placed in Eppendorf  
165 tubes and freeze at  $-80^{\circ}\text{C}$ . Reproductive system weight, gonadosomatic and  
166 digestive gland indexes were calculated as follows:

167

168 Reproductive system weight (RSWI,%) =  $(\text{RSW}/\text{BW} - \text{RSW}) \times 100$

169 Gonadosomatic index (GI,%) =  $(\text{Ovw}/\text{BW} - \text{Ovw}) \times 100$

170 Digestive gland index (DGI, %) =  $(\text{DG}/\text{BW} - \text{DG}) \times 100$

171

172 *Octopus mimus* females were classified based on their maturity status; females  
173 were immature and 15 were at gonadal maturation. Maturing females were  
174 classified in three categories: 1) physiological maturation (Phys Mat; n = 4), 2)  
175 early functional maturation (Ea Func Mat; n = 6), and 3) late functional  
176 maturation (La Func Mat; n = 5). Phys Mat animals were at initial vitellogenesis  
177 (stage III of ovocytes), Ea Func Mat were females with eggs in the reproductive  
178 coeloma and La Func Mat were females with eggs at the end of the maturation  
179 process (Avila-Poveda et al. 2016; Olivares et al. 2017). To classify maturing  
180 females, preserved (formalin, pH 7), ovarium samples (one per each sampled  
181 female, n= 23) were cut at the middle level in transverse and longitudinal  
182 sections. The sections were washed in 70% ethanol and dehydrated in ethanol  
183 series, cleared in benzene, infiltrated and embedded in paraplast ®. Serial  
184 sections were cut at a thickness of 5 µm using a Leitz 1512 manual rotary  
185 microtome, mounted on glass slides and stained using the routine Harris  
186 hematoxylin-eosin regressive method (HHE<sub>2</sub>; Luna 1968, Howard and Smith  
187 1983). Alcian blue at pH 1.0 was used to contrast acidic mucopolysaccharides  
188 (Humason 1962).

189

### 190 *2.3 Embryo development*

191 Eight females were placed individually in 108 L tanks with open and aerated  
192 seawater flow at optimum temperatures of 16 to 20°C (Uriarte et al. 2012).  
193 These individuals were kept in a semi-dark environment to stimulate spawning  
194 conditions, which occurred 8 to 20 d later. A string of eggs from each female  
195 was sampled every 4 to 7 d; embryos were classified, sorted and freeze dried  
196 for biochemical analysis. Stages of embryo development for *Octopus mimus*  
197 were classified according to Naef (1928). One to two d old paralarvae were  
198 sampled and stored at -80°C. Samples of females, embryos and paralarvae  
199 were freeze dried and transported to Unidad Multidisciplinaria de Docencia e  
200 Investigación of Faculty of Science, of Universidad Nacional Autónoma de  
201 México located in Sisal, Mexico for biochemical analysis.

202

203 *2.4 Metabolites, digestive enzymes, antioxidant mechanisms and AChE during*  
204 *maturation process, embryo development and hatchlings*



205 Metabolites. Samples were homogenized in cold buffer Tris pH 7.4 at 100 mg  
206 tissue/mL using a Potter-Elvehjem homogenizer. The samples were then  
207 centrifuged at 10,000 × g for 5 min at 4°C and the supernatant was separated  
208 and stored at -80°C until analysis. Acylglycerols (AG) were analyzed using the  
209 Ellitech TGML5415 kit; cholesterol was measured using the Ellitech CHSL5505  
210 kit, and glucose was analyzed using the Ellitech GPSL0507 kit following  
211 manufacturer's instructions. Samples were diluted 1:300 for soluble protein  
212 determination using a commercial kit (Bio-Rad; Cat. 500-0006) (Bradford 1976).  
213 Determinations were adapted to a microplate using 20 µL of supernatant and  
214 200 µL of enzyme chromogen reagent. Absorbance was recorded using a  
215 microplate reader (Benchmark Plus, Bio-Rad), concentrations were calculated  
216 from a standard substrate solution and expressed as mg/ml.

217 Enzyme activity assays. Acid proteases activity at pH 4 was evaluated  
218 according to Anson (1938) with adjustments, using a solution of 1% (w/v)  
219 hemoglobin (BD Bioxom- USB Products – 217500 hammersten quality) in  
220 universal buffer (Stauffer, 1989). Alkaline proteases activity of the extracts at pH  
221 8 was measured using the method of Kunitz (1947) modified by Walter (1984),  
222 using 1% (w/v) casein (Affymetrix, 1082-C) as substrate in 100 mM universal  
223 buffer. In both assays, 0.5 ml of the substrate solution was mixed in a reaction  
224 tube with 0.5 ml of universal buffer and 20 µl of enzyme preparation (1:100  
225 dilution) and incubated for 10 min at 35 °C and 40 °C for alkaline proteases and  
226 acid proteases, respectively. The reaction was stopped by adding 0.5 ml of 20%  
227 (w/v) trichloroacetic acid (TCA) and cooling on ice for 15 min. The precipitated  
228 undigested substrate was separated by centrifugation for 15 min at 13,170 g.  
229 The absorbance of the supernatants was measured spectrophotometrically at  
230 280 nm. Control assays (blanks) received a TCA solution before the substrate  
231 was added.

232 For trypsin, the adjusted methods of Charney and Tomarelli (1947) was used.  
233 The trypsin activity of the extracts was measured using 1 mM BAPNA (Benzoyl-  
234 L-Arg-p-nitroanilide) as substrate TRIS 0.1 M at pH 7. This assay was made in  
235 microplate as follows: 250 µl of the substrate solution was mixed with 5 µl of  
236 enzyme preparation (1:2). The absorbance was measured  
237 spectrophotometrically at 405 nm every minute, during 2 minutes. A mix of 5 µl

238 of distilled water with 250  $\mu$ l of substrate solution was used as control assay  
239 (blank).

240 Lipases activity was measured in microplate using 200  $\mu$ l substrate solution  
241 (TRIS 0.5 M, pH 7.4, sodium taurocholate 5 mM, sodium chloride 100 mM, 4  
242 nitrophenyl octanoate 0.35 mM) and 5  $\mu$ l homogenate diluted (1:2) in TRIS 0.5  
243 M, pH 7.4 (Gjellesvik, et al. 1992). Absorbance was read at 415 nm every  
244 minute, during 10 minutes.

245 For all enzymes, units of activity were expressed as change in absorbance per  
246 minute per milligram of protein ( $U = \text{Abs}_{\text{nm}} \text{min}^{-1} \text{mg}^{-1} \text{protein}$ ).

247

248 Antioxidant defence system. Samples were snap-frozen in liquid nitrogen,  
249 lyophilized and stored at  $-20^{\circ}\text{C}$  until homogenization. Samples were  
250 homogenized in cold buffer Tris 0.05 M pH 7.4 at 10 mg tissue/mL using a  
251 Potter-Elvehjem homogenizer. For enzyme activity assays, homogenates were  
252 centrifuged at  $10,000 \times g$  for 5 min at  $4^{\circ}\text{C}$  and the supernatant was separated  
253 for analysis. All samples were stored at  $-80^{\circ}\text{C}$  until analysis.

254

255 Redox potential was measured with a probe (ArrowDox Measurement  
256 System, ORP-146CXS, Los Angeles, USA) in each homogenate (in mV) .  
257 Posteriorly, the homogenate was divided for triplicate assays to measure the  
258 activities of acetylcholinesterase (AChE), carboxylesterase (CbE), catalase  
259 (CAT), glutathione S-transferase (GST), and for levels of lipid peroxidation  
260 (LPO) and total glutathione (GSH). All spectrophotometric measurements were  
261 realized in a micro-plate reader. AChE activity was measured using a  
262 modification of the method described by Ellman et al. (1961), which was  
263 adapted to a microplate reader (Rodríguez- Fuentes et al. 2008). Each well  
264 contained 10  $\mu$ L of the enzyme supernatant and 180  $\mu$ L of 5, 5' -dithiobis (2  
265 nitrobenzoic acid) (DTNB) 0.5 M in 0.05 mM Tris buffer pH 7.4. The reaction  
266 started by adding 10  $\mu$ L of acetylthiocholine iodide (final concentration 1 mM)  
267 and the rate of change in the absorbance at 405 nm was measured for 120s.  
268 CbE activity, a detox enzyme, was measured using  $p$ -nitrophenyl- $\alpha$ -  
269 arabinofuranoside ( $p$ NPA) substrate, as indicated by Hosokawa and Satoh  
270 (2001) with some modifications (25  $\mu$ L of the supernatant and 200  $\mu$ L of  $p$ NPA  
271 were mixed, and the reaction was recorded for 5 min at 405 nm).



272

273 CAT activity was measured using the Goth (1991) method with modifications  
274 made by Hadwan and Abed (2016). In this method, the undecomposed H<sub>2</sub>O<sub>2</sub> is  
275 measured after 3 minutes with ammonium molybdate to produce a yellowish  
276 color that has a maximum absorbance at 374 nm. GST activity was determined  
277 from the reaction between reduced glutathione and 1-chloro-2,4-dinitrobenzene  
278 at 340 nm (Habig and Jakoby 1981). AChE, CbE, CAT, and GST activities were  
279 reported in nmol min<sup>-1</sup> mg protein<sup>-1</sup>. Proteins were analyzed in the supernatant  
280 according to Bradford (1976) and was used to normalize enzyme activities.  
281 Total glutathione (GSH) was measured with a Sigma-Aldrich Glutathione Assay  
282 Kit (CS0260). This kit utilizes an enzymatic recycling method with glutathione  
283 reductase (Baker *et al.*, 1990). The sulfhydryl group of GSH reacts with  
284 Ellman's reagent and produces a yellow colored compound that is read at 405  
285 nm. LPO was evaluated using the PeroxiDetect Kit (PD1, Sigma-Aldrich, USA)  
286 following the manufacturer's instructions and was reported in nmol mL<sup>-1</sup>. The  
287 procedure is based on peroxides oxidize iron (Fe<sup>3+</sup>) that forms a coloring  
288 component with xylene orange at acidic pH measured at 560 nm.

### 289 2.5. Statistical analysis

290 General data were expressed as mean ( $\pm$  standard deviation, SD). Differences  
291 of the mean values of each measurement variables, female tissue, embryo and  
292 paralarvae (i.e. BW, Ovw, RSW, and DG weights) were tested each one using  
293 one-way ANOVA followed by Fisher LSD (least significant difference) test  
294 (Sokal and Rohlf 1995). Before ANOVA, assumption tests were carried out to  
295 determine the homogeneity of variances for each measurement and those that  
296 did not fit the premises for ANOVA were transformed using more appropriate  
297 measurement scales (McCune *et al.* 2002). Statistical analyses were carried out  
298 using STATISTICA® 7. The significance of the statistical difference was  
299 accepted at  $p < 0.05$ .

300 We evaluated the synergistic way in which the physiological processes are  
301 carried out in *O. mimus* females during the maturation of the gonads and in  
302 embryos during development. Therefore, multivariate sets of descriptors were  
303 analysed: 1) reproductive condition: BW, OVW, DG, EBW and RSW (mg); 2)  
304 metabolite concentration in ovaries: Glycogen, Glucose, Chol, Triacyl and Prot  
305 (mg/ml); 3) metabolite concentration and enzyme activity in the digestive gland:

306 Glycogen, Glucose, Chol, Triacyl and Prot, AcidProt and AlkaProt (UI/mg  
307 protein). Data on *O. mimus* embryos and paralarvae were analysed using three  
308 multivariate sets of descriptors considering four well recognized phases during  
309 embryo development: i) organogenesis (namely Pre); ii) the end of  
310 organogenesis around stages XIV and XV (namely Organ); iii) Growth (post  
311 organogenesis, namely Post) and iv) one d old (1<sup>st</sup>) and two d old (2<sup>nd</sup>)  
312 paralarvae. The descriptors used were 1) metabolite concentration in body as a  
313 whole: Glycogen, Glucose, Chol, Triacyl and Prot (mg/ml); 2) enzyme activity:  
314 acid and alkaline proteases (UI/mg protein) and 3) antioxidant defence  
315 mechanisms: Ache, CbE, GsT, SOD, CAT (nMol/min/mg protein), ORP (mV),  
316 GsH (nMol/ml), LPO (nMol peroxide/ml). Principal Coordinate Analysis (PCoA)  
317 was applied on Euclidean distance matrices of samples in each data set  
318 (Legendre and Legendre, 1998). Data were square root (female data) or log-  
319 transformed (embryo and paralarvae data), and normalised by centring and  
320 dividing between the standard deviation of each variable prior to analysis  
321 (Legendre and Legendre, 1998).

322 A permutational multiple ANOVA was applied on the distance matrices to detect  
323 differences amongst female octopuses in four different stages of gonadic  
324 maturation (fixed factor: Imm, PhyMat, EarFunMat, LatFunMat), and amongst  
325 embryos and paralarvae in different stage of development (Pre, Organ, Post,  
326 1st and 2nd paralarvae). Permutational multiple paired t-tests were used to  
327 compare the centroids of the different stages in each data set; 9999 unrestricted  
328 permutations of raw data were used to generate the empirical *F* and *t*-  
329 distributions (Anderson, 2001; McArdle and Anderson, 2001).

330

### 331 3. Results

#### 332 3.1. *Octopus mimus* females reproductive condition

333 Total and eviscerated wet weight changed with maturation of females with low  
334 values in females at immature stage and high values in females in late  
335 functional maturity stage (Fig. 1A). At the end of maturation, total and  
336 eviscerated weight resulted 3.2 and 2.7 higher than observed in immature  
337 females ( $p < 0.0001$ ; Fig. 1A). Likewise, an increment of reproductive complex  
338 system (RCS), ovarium and oviductal wet weight were registered along the  
339 maturity stages; RSW, Ovw and oviductal gland wet weight values at the end of

340 maturity stages were 108, 135 and 2.55 times higher than in immature females,  
341 respectively (Fig 1B). As a consequence, increments in RSWI and Ovwl were  
342 observed along the maturity stages (Fig. 1C).

343

344 Digestive gland wet weight changed along the maturity stages with low values  
345 in immature females and high values at the end of the maturation process ( $p <$   
346  $0.001$ ; Fig. 2). In contrast, hepatosomatic index (HI, %) increased with  
347 maturation stages to reach a peak at the beginning of the functional maturation,  
348 when oocytes were sent to reproductive coelom (Fig. 2). The hepatosomatic  
349 index was reduced at the end of the maturation stage.

350

### 351 3.1. Biochemical composition

#### 352 a. Glycogen.

353 Immature *O. mimus* females showed digestive gland glycogen levels 59% lower  
354 than females at the beginning of the maturation process (Fig. 1A;  $p < 0.001$ ). A  
355 significant increment of DG glycogen was subsequently registered in females in  
356 physiological maturation, reaching values 2.4 times higher than the levels  
357 observed in immature females ( $p < 0.001$ ; Fig. 3A). A reduction in 38% of  
358 digestive gland glycogen values was registered ( $p < 0.01$ ; Fig. 3A). Increments  
359 of ovarium glycogen concentration were detected during maturation with high  
360 glycogen levels obtained in the ovaries of females at the end of the maturation  
361 process (Fig. 3A;  $p < 0.01$ ). In *O. mimus* embryos, glycogen levels of stages I to  
362 XIV and XVIII did not show statistical differences with a mean value of  $26.8 \pm$   
363  $9.0$  mg/g ( $p > 0.05$ ; Fig. 3A). Glycogen levels of embryos at stage XVI and  
364 paralarvae 1 and 2 were statistically lower than the rest of the embryos (Fig. 3A;  
365  $p < 0.01$ ).

366

#### 367 b. Glucose

368 Digestive gland glucose levels were similar in immature females and during  
369 almost all maturation process ( $p > 0.5$ ; Fig 3B). Only females in late functional  
370 maturation process had glucose levels significantly lower than in the rest of the  
371 maturation conditions ( $p < 0.001$ ; Fig. 3B). A reduction in glucose levels was  
372 recorded in ovaries according with the maturation process, with higher levels in  
373 immature females (0.5 mg/ml) than in late functional maturation condition ( $p <$

374 0.001; Fig 3B). Glucose levels were similar along embryo development. In  
375 consequence, a mean value of  $0.13 \pm 0.02$  mg/ml was calculated for all embryo  
376 stages ( $p > 0.05$ ; Fig 3B). Glucose levels in 1 d old paralarvae were 4 times  
377 higher than in embryos and 1.3 times higher than observed in 2 d old  
378 paralarvae ( $p < 0.002$ ; Fig 3B).

379 c. Protein

380 Digestive gland protein did not change during the female maturation process ( $p$   
381  $> 0.05$ ; Fig. 3C). In contrast, an increment of soluble protein was recorded in  
382 ovarium in relation with maturation process, with low values in immature  
383 females and high at the end of the maturation process ( $p < 0.001$ ; Fig. 3C).  
384 There were no statistical differences in protein levels of embryos of stages I to  
385 X, with a mean value of  $63.8 \pm 3.7$  mg/ml ( $p > 0.05$ ; Fig. 3C). After those stages,  
386 a reduction of soluble protein levels occurred in embryos and paralarvae to  
387 reach the lower value in 2 d paralarvae of *O. mimus* ( $p > 0.05$  Fig; 3B).

388

389 d. Triacyl glycerol (TG)

390 Digestive gland TG values did not change with female maturation stages; for  
391 this reason, a mean value of  $0.35 \pm 0.08$  mg/ml was calculated ( $p > 0.05$ ; Fig.  
392 4A). There were strong changes in TG values in female ovarium, with low  
393 values in immature females (1.05 mg/ml) and at the end of the maturation stage  
394 (1.6 mg/ml) ( $p > 0.05$ ). In contrast, TG values were high in females at the end of  
395 physiological maturation and during the early maturation process ( $p < 0.001$ ;  
396 Fig. 4A). Levels of TG in embryos were highly variable; TG levels were high in  
397 stages I, IV, VII, and X to XVIII but low in stages II and IX ( $p < 0.01$ ; Fig. 4A).  
398 Values of TG recorded in 1 and 2 d old paralarvae resulted 1.5 times higher  
399 than the maximum value recorded in embryos at stage X ( $p < 0.01$ ; Fig. 4A).

400

401 e. Cholesterol

402 Cholesterol levels in the digestive gland remained constant along the  
403 maturation stages of *O. mimus* females ( $p > 0.05$ ; Fig. 4B). Cholesterol levels in  
404 the ovarium changed with maturation stages of females with high levels in  
405 immature animals. There was a subsequent reduction of cholesterol levels at  
406 the beginning of the maturation process, followed by an increment in the next

407 maturation stages to reach the maximum concentration level at the end of the  
408 maturation process ( $p < 0.002$ ; Fig. 4B).

409

### 410 3.2. Digestive enzymes

411

412 Acidic and alkaline proteases activity was constant along the embryo  
413 development until stage XIV by alkaline and stage XVIII by acidic proteases  
414 (Fig. 5). Alkaline proteases activity increased after stage XIV to reach its  
415 maximum and significant activity after hatching ( $p < 0.001$ ; Fig 5A). A maximum  
416 acidic proteases activity also was recorded in *O. mimus* after hatching. In adult  
417 females, there were no statistical differences in activity of acidic proteases  
418 along the maturity stages ( $p > 0.05$ ; Fig 5A). In contrast, a lower activity of  
419 alkaline proteases was registered in immature females in comparison with  
420 maturing and mature *O. mimus* females (Fig. 5A). Lipases and trypsin  
421 activities changed with embryo development, with low values in stages lower  
422 than XIII, and higher in stages XIV to XVIII ( $p < 0.001$ ; Fig. 5B). A reduction on  
423 lipases activity was recorded in 1 d old paralarvae ( $p < 0.001$ ; Fig. 5B).

### 424 3.3. Acetyl cholinesterase (AChE) and antioxidant defence mechanisms (ADM)

425 AChE increased along the embryo development with low AChE values at the  
426 beginning of embryo development and high values after hatching ( $p < 0.01$ ; Fig  
427 6A). Antioxidant defence mechanisms (GST, SOD and CAT) showed the same  
428 tendency, with low values at the beginning of embryo development and high  
429 values after hatching ( $p < 0.01$ ; Fig. 6 B to D). As a consequence, a reduction in  
430 oxidative damage (CbE; ORP and LPO) and GSH was observed with high  
431 values in embryos at the beginning of the development and low values after  
432 hatching. It is interesting to note that LPO and GSH levels start to be reduced  
433 around stage XV to maintain a low level until hatch ( $p < 0.001$ ; Fig 6).

434

435 Ordination by PCoA of the reproductive condition of female *O. mimus* showed  
436 that the PCo1 explained 94.9 % of total variation in the data, with EBW, BW,  
437 OVW and RSW greatly contributing to ordination in the horizontal axis (Fig. 7A).  
438 The PCo2 explained only 4.2% of the total variation, with differences in DG  
439 contributing to the ordination in the vertical axis. Values of all the reproductive  
440 condition descriptors increased as females advanced from immature to

441 physiological and functional stages of gonadic maturation (Fig. 7A). Females in  
442 late functional maturity were distinctly separated and associated WITH the  
443 highest weight values.

444

445 The multiple ANOVA showed overall significant differences between stages of  
446 gonadic maturation (Table 1). However, paired comparisons amongst centroids  
447 revealed that only immature females and those in either early or late functional  
448 maturity differed significantly in the reproductive condition descriptors measured  
449 (Table 2).

450

451 Ordination of the concentration of metabolites in female ovaries showed that the  
452 PCo1 and PCo2 explained 74% of the total variation (54.8% and 19.2%,  
453 respectively; Fig. 7B). Concentration of Glycogen, Chol and Prot contributed  
454 mostly to the ordination on the horizontal axis, whereas Glucose and Triacyl did  
455 so on the vertical axis. The multiple ANOVA showed overall significant  
456 differences between stages of gonadic maturations (Table 1). Paired  
457 comparison between centroids allowed for three distinct groups to be formed  
458 based on ovary metabolites: immature; physiologically and early functionally  
459 mature, and late functionally mature females (Table 2).

460 Ovary samples from immature females were high in glucose and cholesterol,  
461 but low in triacylglycerides and proteins when compared to samples from late  
462 functionally mature females; physiologically and early functional mature females  
463 presented intermediate ovary concentrations of these metabolites (Fig. 7B).

464 Together, the first and second PCo only explained 63.8% of the total variation in  
465 metabolite concentration and enzyme activity of the digestive gland in female *O.*  
466 *mimus* (39.5% and 24.3%, respectively; Fig. 7C); the percentage of total  
467 variation increased to 79% when the third PCo was considered. Glucose was  
468 inversely correlated with glycogen, triacylglycerides and cholesterol, whilst  
469 protease activity was correlated with protein concentration in all three principal  
470 coordinates. Significant differences between stages of gonadic maturation were  
471 also detected by the general multiple MANOVA (Table 1). However, paired



472 comparisons between centroids only revealed significant differences in  
473 immature females and those in late functional maturity (Table 2).

474 Immature females had high concentrations of glucose and both acid and  
475 alkaline protease activity in the digestive gland. Fully functionally mature  
476 females had relatively higher concentration of glycogen and lower protease  
477 activity in the digestive gland.

478 The first and second PCo explained 56.7% and 20% of total variation of  
479 metabolite concentration in embryos and paralarvae (Fig. 8A). Glucose and  
480 triacylglycerides were inversely correlated with glycogen and proteins and  
481 contributed largely to sample ordination in the horizontal axis. Cholesterol  
482 concentration contributed to order samples on the vertical axis (Fig. 8A). The  
483 multiple MANOVA detected overall significant differences amongst stages of  
484 embryo and paralarvae (Table 1). Significant differences in paired comparisons  
485 allowed to distinguish three groups: embryos in stages prior to organogenesis  
486 (Pre); embryos in stages characterised by organogenesis and immediately after  
487 (Organ and Post); and the first and second paralarvae. Embryos prior to enter  
488 organogenesis had high glycogen and protein concentration but low glucose  
489 and triacylglyceride concentration. Embryos at stages Organ and Post had high  
490 cholesterol concentrations and intermediate values in all other metabolites. The  
491 1st and 2nd stage paralarvae had high glucose and triacylglyceride but low  
492 glycogen and protein concentrations (Fig. 8A).

493

494 Ordination of protease activity in *O. mimus* embryos and paralarvae showed  
495 that the PCo1 and PCo2 explained 92.6 and 7.4% of total variation, respectively  
496 (Fig. 8B). Enzyme activity in general increased as embryos advanced from  
497 stages before organogenesis and towards the 2nd paralarvae, with paralarvae  
498 having higher alkaline protease but lower acid protease activity than embryos.  
499 The multiple ANOVA showed significant differences between stages of  
500 development (Table 1), and significant differences were detected between all  
501 pairs of centroids except those representing the 1st and 2nd paralarvae (Table  
502 2). These results show four distinct groups of samples regarding enzyme

503 activity: embryos before, during and after organogenesis, and paralarvae (Fig.  
504 8B).

505

506 Analysis of the antioxidant defence mechanisms in *O. mimus* embryos and  
507 larvae showed that the first and second PCo explained 68.7% and 12% of total  
508 data variation (Fig. 8C). Lipid peroxidation and carboxylesterase were high  
509 amongst embryos in stages before organogenesis, and were inversely  
510 correlated to acetylcholinesterase, catalase, glutathione S-transferase and  
511 superoxide dismutase, which had the highest values amongst 1<sup>st</sup> and 2<sup>nd</sup> day  
512 paralarvae (Fig. 8C). Whilst the multiple ANOVA showed overall significant  
513 differences throughout development (Table 1), paired tests amongst centroids  
514 revealed significant differences only between extreme stages (Table 2).

515

## 516 Discussion

517 Previous studies of *O. mimus* from Northern Chile have investigated size at  
518 maturity and support our finding that females heavier than 2000 g are mature  
519 (Cortez et al. 1995). Patterns of body, reproductive tract, digestive gland  
520 weights and their indices observed in this study were consistent with (Cortez et  
521 al. 1995). As was expected, increments on RSW and reproductive indices were  
522 observed along the reproductive maturity stages, indicating that during ovarian  
523 development there was mobilization of energy and nutrients to reproductive  
524 organs. Studies suggested that *O. vulgaris*, *O. defilippi* (Rosa et al. 2004) and  
525 in the squids *Illex coindetii* and *Todaropsis eblanae* (Rosa et al. 2005) take the  
526 energy for egg production directly from food rather than from stored products in  
527 a specific tissue. This was concluded based on the observation that, while  
528 mature females experience increments of protein, lipid and glycogen contents in  
529 gonads, the digestive gland and muscle where without apparent changes  
530 between both maturation stages. This indicates that storage reserves were not  
531 transferred from tissue to tissue during ovaria maturation, which is consistent  
532 with our findings. Moreover, our study suggests that during the maturation  
533 process there was mobilization of nutrients at the DG and ovarium that where  
534 not observed previously. As can be expected in the DG of *O. mimus* females,

535 free glucose is an important source of metabolic energy. Free glucose was  
536 highly concentrated along the maturation process until the early functional  
537 maturation, when oogonia are growing in the ovarium. It was observed that  
538 levels of progesterone, the hormone involved in oocytes vitellogenesis, were  
539 high during the early functional maturation of *O. maya* (Avila-Poveda et al.  
540 2015). This finding suggests that these processes require high levels of  
541 metabolizable energy. Accordingly, glycogen and glucose in the digestive gland  
542 of *O. mimus* and *O. maya*, as well as soluble proteins were used as a source of  
543 metabolic energy during digestive processes (Gallardo et al. 2017) and growth  
544 of juveniles and pre-adults of *O. maya* (Aguila et al. 2007; Rosas et al. 2011).  
545 Hence the importance of those nutrients in the physiology of cephalopods.  
546 According to Martínez et al., (2014) this energy is the result of gluconeogenic  
547 pathways supported by the protein metabolism due to the carnivorous habits of  
548 cephalopods. For this reason we hypothesise that, as in DG (Martinez et al.,  
549 2014) in the ovarium part of the glycogen and glucose registered followed the  
550 glycogenic pathways (Hochachka & Fields 1982) (Fig. 9),as was previously  
551 described in muscle of different cephalopod species (Gallardo et al. 2017;  
552 Hochachka & Fields 1982; Morales et al. 2017).

553

554 The dynamics of glycogen and glucose observed in the ovarium of *O. mimus*  
555 suggest that there are biochemical regulatory mechanisms involved in storing  
556 and mobilization of nutrients. In the present study, high glucose levels were  
557 observed in the ovarium of immature females and during physiological  
558 maturation. This suggests that glucose could be used as a source of energy at  
559 the beginning of the complex processes involved in oocytes synthesis.  
560 However, a decrease of glucose levels was recorded during the functional  
561 maturation, with the lowest levels detected at the end of the process. If glucose  
562 is used only as a source of energy, why a reduction in glucose was recorded  
563 when the vitellogenesis process was at its maximum level? It is possible that  
564 the ovarium required less energy in the last part of the vitellogenesis than in  
565 previous maturation stages, or alternatively, glucose was reduced to avoid its  
566 inhibitory effects. Excess of glucose inhibits vitellogenin uptake in insects  
567 (Kunkel et al., 1987). It is therefore possible that a reduction of ovarium glucose  
568 levels in octopus could be associated with mechanisms to avoid physiological

569 problems during the last part of the reproductive process. Glucose levels may  
570 thus be used only as a source of metabolic energy allowing the adequate  
571 vitellogenin uptake. If some mechanism of control exist, it also may be involved  
572 in glycogen synthesis and storing. During the late functional maturation, an  
573 increment of glycogen was registered in the ovarium. This suggests that those  
574 molecules were directly stored in the eggs used as a source of energy during  
575 embryo development and/or to maintain the physiological integrity of females  
576 during parental care that occurs after the spawning (Roumbedakis et al. 2017).

577

578 As was previously observed in *O. vulgaris* (Rosa et al., 2004), in *O. mimus*  
579 there was no apparent mobilization of lipids from the DG to the ovarium. In  
580 cephalopods, the nutrients channelled to the ovarium are thus likely obtained  
581 from the food and not from reserve tissues, as was observed in laboratory  
582 studies (Caamal-Monsreal et al. 2015; Rosa et al. 2005; Tercero-Iglesias et al.  
583 2015).

584

585 In the present study, high levels of TG and cholesterol were detected in  
586 immature females, indicating that even before maturation the females used the  
587 ovary as a reserve of lipid. This means that nutrients come directly from the  
588 food and are not stored in muscle or the digestive gland (Rosa et al., 2005), and  
589 that the ovary itself is a reserve site for nutrients that will be used at least at the  
590 beginning of the maturation process (Fig. 9)

591

592 The increment of TG observed after the maturation processes started, and the  
593 subsequent reduction of cholesterol suggest that cholesterol was required  
594 during the physiological maturation (oocytes growth), probably as a structural  
595 component into the oocytes membranes. This process is characterized at the  
596 beginning by the formation of oocytes, which after growth will be transformed in  
597 secondary oocytes surrounded by the follicle cells without yolk (Avila-Poveda et  
598 al. 2016). It is highly likely that the oocytes and follicle cells synthesis require  
599 cholesterol during this process because it is an essential component of the  
600 biological membranes (Zubay 1983). High levels of TG were registered once  
601 the vitellogenesis started (early functional maturation process), indicating that  
602 fatty acids are also stored in the ovarium probably to be used in the yolk

603 synthesis. This is supported by low levels of TG in the ovarium of the *O. mimus*  
604 females at the end of the maturation process (late functional maturation). Fatty  
605 acids accumulated as TG were likely transformed and stored into the eggs as  
606 yolk. Moderated cholesterol levels detected at the end of the maturation  
607 process suggest that cholesterol was also stored in the yolk to be used by the  
608 embryos throughout their development (Estefanell et al. 2017).

609

610 As expected, the biochemical and physiological processes in embryos are  
611 highly dynamics following two well identified developmental phases:  
612 organogenesis and growth (Boletzky 1987; Naef 1928). In many octopus  
613 species the first phase occurs between stage I to XII-XIII where the first embryo  
614 inversion allows the embryo to growth in the proximal side of the egg (Boletzky,  
615 1987). During this phase, the nervous system is developed and the retina  
616 pigmentation is evident around stage X to complete organogenesis in *O. mimus*  
617 embryos at stages XII-XIII (Castro-Fuentes et al. 2002).

618

619 Our results indicate that soluble proteins and amino acids may be used as a  
620 source of glycogen, maintaining a stable and permanent supply of glucose  
621 along embryo development even during the growth phase. These results  
622 suggest that glucose is not the most important source of energy for embryos  
623 and that regulation of the gluconeogenic pathway works as a mechanism of the  
624 glucose supply. Regulation thus appears to be coupled with the phases of  
625 embryo development, without control until stage XI, and with control from stage  
626 XII onwards (Fig. 10). Our findings also suggest that energetic demands of  
627 embryos in the first phase of development were relatively low, without  
628 significantly mobilization of energetic substrates and its associated enzymes  
629 (Fig. 10). The molecules identified with redox stress and that were maintained in  
630 the eggs without changes suggest that the antioxidant defence mechanisms  
631 were inactive until the stage XIV.

632

633 The reduction on soluble protein and glycogen, and the increment of lipases  
634 activity in stage XIV embryos and onward indicates that the mobilization of yolk  
635 started at that stage (Fig. 10). Studies on embryos of *O. maya* and *O. mimus*

636 found significant mobilization of yolk from stage XIV to stage XV suggesting that  
637 mobilization of nutrients from yolk marks the start of the embryonic growth  
638 (Caamal-Monsreal et al. 2016; Sánchez-García et al. 2017). It was observed  
639 that heart beats in *O. mimus* increase with embryo development and reach a  
640 relative stability from stage XV, when the growth of embryos was evident  
641 (Warnke 1999). Power growth rate of *Enteroctopus megalocyathus* embryos  
642 was obtained from stage XII (Uriarte et al. 2016), suggesting that this phase of  
643 growth after organogenesis is a common characteristic among octopus  
644 species. The metabolic demand of cephalopods embryos increases with  
645 development as was observed in *Sepia officinalis*, *Loligo vulgaris* (Pimentel et  
646 al. 2012), *E. megalocyathus* (Uriarte et al. 2016), *O. vulgaris* (Parra et al. 2000),  
647 *O. mimus* (Uriarte et al. 2012), and *O. maya* (Caamal-Monsreal et al. 2016;  
648 Sánchez-García et al. 2017). Reactive oxygen species (ROS) are produced  
649 during this process, which consequently leads to oxidative stress (Regoli et al.  
650 2011). To prevent oxidative stress and keep the balance of the cell aerobic  
651 organisms have evolved an efficient antioxidant defence system that consists of  
652 both non-enzymatic small antioxidant molecules (e.g. reduced glutathione  
653 (GSH), ascorbic acid (AA), carotenoids, etc.) and a cascade of enzymes (e.g.  
654 superoxide dis-mutase (SOD), catalase (CAT), and glutathione peroxidase  
655 (GPx) (Regoli & Giuliani 2014). A recent study on the role of the enzymatic  
656 antioxidant system in the thermal adaptation of *O. vulgaris* and *O. maya*  
657 embryos suggests that early developmental stages of cephalopods have  
658 temperature-regulated mechanisms to avoid oxidative stress (Repolho et al.  
659 2014; Sánchez-García et al. 2017). In the present study, it was observed that  
660 ROS of *O. mimus* embryos were almost totally eliminated during the growth  
661 phase of the embryo development due to the activation of the antioxidant  
662 defence mechanisms in stage XIV, indicating the coupling between metabolic  
663 demands and the functioning of the antioxidant defence system against oxidant  
664 stress.

665

666 During the burst of anaerobic swimming of *O. vulgaris* paralarvae the energy is  
667 obtained from glucose and from the Arginine phosphate system mediated by  
668 lactate dehydrogenase (LDH) and octopine dehydrogenase (ODH) respectively  
669 (Morales et al. 2017). Both systems require pyruvate, either by the



670 gluconeogenic route or via the degradation of amino acids by transamination  
671 (Zubay 1983). We hypothesize that the operating mechanism in *O. mimus*  
672 embryos may be associated with amino acids and lipid catalysis because both  
673 substrates (mainly arginine and glycerol) are involved in pyruvate production in  
674 cephalopods (Morales et al. 2017). The apparent lack of activity of lipases until  
675 stage X, and the moderate activity of alkaline and acidic enzymes along the  
676 development of *O. mimus* embryos may be involved in physiological regulation  
677 of the energy supply in those organisms. Accordingly, the yolk consumption in  
678 *O. maya* embryos starts after the stage XIV, when organogenesis ends  
679 (Caamal-Monsreal et al. 2015; Sánchez-García et al. 2017) and the antioxidant  
680 defense mechanisms start its activity.

681

## 682 Conclusions

683 This study demonstrates that ovarium can be used as a reserve of some  
684 nutrients for reproduction. Acyl glycerides were stored at the beginning of the  
685 maturation processes followed by cholesterol. Acyl glycerides and cholesterol  
686 were energetically supported by glucose and derived from glycogen following  
687 gluconeogenic pathways. This suggests that a control mechanism of protein-  
688 glycogen-glucose may be operating in *O. mimus* ovarian. We hypothesize that  
689 glucose is the energetic support at the beginning of ovarian maturation and also  
690 has the potential role as inhibitor of vitellogenin uptake at the end of the  
691 processes. It was observed that embryos during organogenesis, nutrients and  
692 enzymes (metabolic, digestive and REDOX system) were maintained without  
693 significant changes and in a low activity. During organogenesis, yolk was  
694 maintained constant indicating that blastulation and gastrulation do not appear  
695 to be influenced by the size of the yolk mass (Boletzky 2003). In this phase, the  
696 outer yolk sac envelope combined with its role of reserve of nutrients have the  
697 provisional function of gill and heart. Its activity is supported by a dense ciliature  
698 covering the entire yolk sac surface that maintain perivitelline fluids in circulation  
699 and oxygen uptake by the embryo (Boletzky 1989). Our results suggest that this  
700 activity has a low energetic cost. In contrast, it was observed that during the  
701 embryo growth, when the activity of the heart was evident (Castro-Fuentes et  
702 al. 2002), there was mobilization of nutrients and activation of the metabolic  
703 and digestive enzymes, as well as increments in the consumption of yolk and

704 glycogen, and the reduction in molecules associated with oxidative stress. This  
705 allowed paralarvae to hatch with the antioxidant defence mechanisms ready to  
706 support the ROS production.

707

#### 708 Funding statement

709 This study was supported with funding from the Program PAPIIT-UNAM  
710 IN219116 awarded to CR and partially financed by DGCI through  
711 TEMPOXMAR. The authors also thank the Dirección General de Asuntos del  
712 Personal Académico-UNAM for providing a Postdoctoral position to NT. The  
713 CONACYT infrastructure I010/186/2014 grant was awarded to CR.

714

#### 715 Literature cited

716 Aguila J, Cuzon G, Pascual C, Domingues P, Gaxiola G, Sánchez A,  
717 Maldonado T, and Rosas C. 2007. The effects of fish hydrolysate  
718 (CPSP) level on *Octopus maya* (Voss and Solis) diet: Digestive enzyme  
719 activity, blood metabolites, and energy balance. *Aquaculture* 273:641-  
720 655.

721 Avila-Poveda O, Móntez-Pérez RC, Koueta N, Benites-Villalobos F, Ramírez-  
722 Pérez JS, Jimenez-Gutierrez LR, and Rosas C. 2015. Seasonal changes  
723 of progesterone and testosterone concentrations throughout gonad  
724 maturation stages of the Mexican octopus, *Octopus maya* (Octopodidae:  
725 *Octopus*). *Molluscan Research* 35:161-172.

726 Avila-Poveda OH, Koueta N, Benites-Villalobos F, Santos-Valencia J, and  
727 Rosas C. 2016. Reproductive traits of *Octopus maya* (Cephalopoda:  
728 Octopoda) with implications for fisheries management *Molluscan*  
729 *Research* 36:29-44.

730 Baltazar P, Rodríguez P, Rivera W, and Valdivieso V. 2000. Cultivo  
731 experimental de *Octopus mimus* Gould, 1852 en el Perú. *Revista*  
732 *Peruana de Biología* 7:151-160.

733 Boletzky SV. 1987. Embryonic phase. In: Boyle PR, editor. *Cephalopod Life*  
734 *Cycles*, vol II. London: Academic Press. p 5-31.

- 735 Boletzky Sv. 1989. Recent studies on spawning, embryonic development, and  
736 hatching in the cephalopoda. *Adv Mar Biol* 25:85-109.
- 737 Boletzky SV. 2003. Biology of early life in cephalopod molluscs. *Advances in*  
738 *Marine Biology* 44:144-203.
- 739 Bradford MM. 1976. A refined and sensitive method for the quantitation of  
740 microgram quantities of protein utilizing the principle of protein-dye  
741 binding. *AnalBiochem* 72:248.
- 742 Caamal-Monsreal C, Mascaró M, Gallardo P, Gallardo P, Rodriguez S, Noreña-  
743 Barroso E, Domingues P, and Rosas C. 2015. Effects of maternal diet on  
744 reproductive performance of *O. maya* and its consequences on  
745 biochemical characteristics of the yolk, morphology of embryos and  
746 hatchlings quality. *Aquaculture* 441:84-94 doi:  
747 10.1016/j.aquaculture.2015.1001.1020.
- 748 Caamal-Monsreal C, Uriarte I, Farias A, Díaz F, Sánchez A, Re AD, and Rosas  
749 C. 2016. Effects of temperature on embryo development and metabolism  
750 of *O. maya*. *Aquaculture* 451:156-162.
- 751 Cardoso F, Villegas P, and Estrella C. 2004. Observaciones sobre la biología  
752 de *Octopus mimus* (Cephalopoda: Octopoda) en la costa peruana.  
753 *Revista Peruana de Biología* 11:45-50.
- 754 Carrasco S, and Guisado C. 2010. Effects of alimentary regime on feeding,  
755 growth, and proximal composition of *Octopus mimus* Gould, 1852  
756 (Cephalopoda: Octopodidae). *J Shellfish Res* 29:455–461.
- 757 Castro-Fuentes H, Olivares-Paz A, Quintana-Fellay A, and Zuñiga O. 2002.  
758 Description of embryonic development and paralarva of *Octopus mimus*  
759 (Gould, 1852) (Mollusca: Cephalopoda) in captivity. *Estud Oceanol*  
760 21:13-25.
- 761 Cortez T, Castro BG, and Guerra A. 1995. Reproduction and condition of  
762 female *Octopus mimus* (Mollusca: Cephalopoda).

- 763 Cortez T, Gonzalez AF, and Guerra A. 1999. Growth of cultured *Octopus*  
764 *mimus* (Cephalopoda: Octopodidae). . *Fish Res* 40:81-89.
- 765 Estefanell J, Mesa-Rodríguez A, Ramírez B, La Barbera A, Socorro j,  
766 Hernández-Cruz CM, and Izquierdo M. 2017. Fatty Acid Profile of Neutral  
767 and Polar Lipid Fraction of Wild Eggs and Hatchlings from Wild and  
768 Captive Reared Broodstock of *Octopus*  
769 *vulgaris*. *Frontiers in Physiology* 8:1-8; doi: 10.3389/fphys.2017.00453.
- 770 Gallardo P, Olivarez A, Martínez-Yañez R, Caamal-Monsreal C, Domingues P,  
771 Mascaró M, Sánchez A, Pascual C, and Rosas C. 2017. Digestive  
772 Physiology of *Octopus maya* and *O. mimus*: Temporality of Digestion  
773 and Assimilation Processes. *Frontiers in Physiology* 8:355, doi:  
774 310.3389/fphys.2017.00355.
- 775 Hochachka PW, and Fields JHA. 1982. Arginine, glutamate, and proline as  
776 substrates for oxidation and for glycogenesis in cephalopod tissues. .  
777 *Pac Sci* 36:325–335.
- 778 Márquez L, Quintana D, Lorenzo A, and Almansa E. 2013. Biometrical  
779 relationships in developing eggs and neonates of *Octopus vulgaris* in  
780 relation to parental diet. *Helgol Mar Res* 67:461-470.
- 781 Morales A, Cardenete G, Hidalgo MC, Garrido D, Martín MV, and Almansa E.  
782 2017. Time course of metabolic capacities in paralarvae of the common  
783 octopus, *Octopus vulgaris*, in the first stages of life. Searching  
784 biomarkers of nutritional imbalance. *Frontiers in Physiology* 8:1-8; doi:  
785 10.3389/fphys.2017.00427.
- 786 Naef A. 1928. Die Cephalopoden (Embryologie) *Fauna e flora del Golfo di*  
787 *Napoli* 35:1-375.
- 788 Olivares A, Avila-Poveda OH, Leyton V, Zuñiga O, Rosas C, and Northland-  
789 Leppe I. 2017. Oviducal glands throughout the gonad development  
790 stages: a case study of *Octopus mimus* (Cephalopoda). *Molluscan*  
791 *Research* 37:229-241, doi:210.1080/13235818.13232017.11334275.

- 792 Olivares A, Bustos-Obregón E, Castillo Alvarez V, and Zúñiga O. 2003.  
793 Testicular function variation in adult *Octopus mimus* *IntJMorphol* 21:315-  
794 323.
- 795 Olivares A, Zamora M, Portilla P, and Zúñiga O. 2001. Estudio histológico de la  
796 ovogénesis y maduración ovárica en *Octopus mimus* (Cephalopoda:  
797 Octopodidae) de la II región de Chile. *Estud Oceanol* 20:13–22.
- 798 Olivares A, Zúñiga O, Castro G, Segura C, and Sánchez J. 1996. Bases  
799 biológicas para el manejo de *Octopus mimus*: Reproducción y  
800 crecimiento. . *Estud Oceanol* 15:61–74.
- 801 Parra G, Villanueva R, and Yúfera M. 2000. Respiration rates in late eggs and  
802 early hatchlings of the common octopus, *Octopus vulgaris*. *J Mar Biol*  
803 *Ass UK* 80:557-558.
- 804 Perez-Losada MP, Guerra A, and Sanjuan A. 2002. Allozyme divergence  
805 supporting the taxonomic separation of *Octopus mimus* and *Octopus*  
806 *maya* from *Octopus vulgaris* (Cephalopoda : Octopoda). *Bulletin of*  
807 *Marine Science* 71:653-664.
- 808 Pimentel MS, Trübenbach K, Faleiro F, Boavida-Portugal J, Repolho T, and  
809 Rosa R. 2012. Impact of ocean warming on the early ontogeny of  
810 cephalopods: a metabolic approach. *Mar Biol* 159:2051-2059, doi:  
811 2010.1007/s00227-00012-01991-00229.
- 812 Regoli F, and Giuliani ME. 2014. Oxidative pathways of chemical toxicity and  
813 oxidative stress biomarkers in marine organisms. *Marine Environmental*  
814 *Research* 93:106-117.
- 815 Regoli F, Giuliani ME, Benedetti M, and Arukwe A. 2011. Molecular and  
816 biochemical biomarkers in environmental monitoring: A comparison of  
817 biotransformation and antioxidant defense systems in multiple tissues.  
818 *Aquatic Toxicology* 1055:56-66.
- 819 Repolho T, Baptista M, Pimentel MS, Dionisio G, Trübenbach K, Lopes VM,  
820 Lopes AR, Calado R, Diniz M, and Rosa R. 2014. Developmental and

- 821 physiological challenges of octopus (*Octopus vulgaris*) early life stages  
822 under ocean warming. *J Comp Physiol B* 184:55-64.
- 823 Rosa R, Costa PR, Bandarra N, and Nunes AJP. 2005. Changes in Tissue  
824 Biochemical Composition and Energy Reserves Associated With Sexual  
825 Maturation in the Ommastrephid Squids *Illex coindetii* and *Todaropsis*  
826 *eblanae* *BiolBull* 208:100-113.
- 827 Rosa R, Costa PR, and Nunes L. 2004. Effect of sexual maturation on the  
828 tissue biochemical composition of *Octopus vulgaris* and *O. defilippi*  
829 (*Mollusca: Cephalopoda*). *MarBiol* 145:563-574.
- 830 Rosas C, Sanchez A, Pascual C, Aguila y Elvira J, Maldonado T, and  
831 Domingues P. 2011. Effects of two dietary protein levels on energy  
832 balance and digestive capacity of *Octopus maya* *Aquacult Int* 19:165-  
833 180.
- 834 Roubledakis K, Mascaró M, Martins ML, Gallardo P, Rosas C, and Pascual C.  
835 2017. Health status of post-spawning *Octopus maya* (*Cephalopoda:*  
836 *Octopodidae*) females from Yucatan Peninsula, Mexico. *Hydrobiologia*  
837 doi: 10.1007/s10750-017-3340-y.
- 838 Sánchez-García A, Rodríguez-Fuentes G, Díaz F, Galindo-Sánchez C, Ortega  
839 K, Mascaró M, López E, Caamal-Monsreal C, Juárez O, Noreña-Barroso  
840 E, Re D, and Rosas C. 2017. Thermal sensitivity of *O. maya* embryos as  
841 a tool for monitoring the effects of environmental warming in the  
842 Southern of Gulf of Mexico. *Ecological Indicators* 72:574-585.
- 843 Söller R, Warnke K, Saint-Paul U, and Blohm D. 2000. Sequence divergence of  
844 mitochondrial DNA indicates cryptic biodiversity in *Octopus vulgaris* and  
845 supports the taxonomic distinctiveness  
846 of *Octopus mimus* (*Cephalopoda: Octopodidae*). *Mar Biol* 136:29-35.
- 847 Tercero-Iglesias JF, Rosas C, Mascaró M, Poot-López GR, Domingues P,  
848 Noreña E, Caamal-Monsreal C, Pascual C, Estefanell J, and Gallardo P.  
849 2015. Effects of parental diets supplemented with different lipid sources



- 850 on *Octopus maya* embryo and hatching quality. *Aquaculture* 448:234-  
851 242.
- 852 Uriarte I, Espinoza V, Herrera M, Zuñiga O, Olivares A, Carbonell P, Pino S,  
853 Farias A, and Rosas C. 2012. Effect of temperature on embryonic  
854 development of *Octopus mimus* under controlled conditions. *J Exp Mar*  
855 *Biol Ecol* 416-417:168-175.
- 856 Uriarte I, Martínez-Montaña E, Espinoza V, Rosas C, Hernández J, and Farías  
857 A. 2016. Effect of temperature increase on the embryonic development  
858 of Patagonian red octopus *Enteroctopus megalocyathus* in controlled  
859 culture. *Aquacult Res* 47:2582-2593.
- 860 Warnke K. 1999. Observations on the embryonic development of *Octopus*  
861 *mimus* (Mollusca: Cephalopoda) from Northern Chile. *Veliger* 42:211-  
862 217.
- 863 Zamora M, and Olivares A. 2004. Variaciones bioquímicas e histológicas  
864 asociadas al evento reproductivo de la hembra de *Octopus mimus*  
865 (Mollusca: Cephalopoda). *IntJMorphol* 22 207-216.
- 866 Zubay G. 1983. *Biochemistry*. USA: Addison-Wesley Publishing Company.
- 867 Zuñiga O, Olivares A, and Ossandón L. 1995. Influence of lighth in female sexual  
868 maturation of *O. mimus*. *Estud Oceanol* 14:75-76.
- 869 Zuñiga O, Olivarez A, Rojo M, Chimal ME, Díaz F, Uriarte I, and Rosas C.  
870 2013. Thermoregulatory behavior and oxygen consumption of *Octopus*  
871 *mimus* paralarvae: The effect of age. *Journal of Thermal Biology* 38:86-  
872 91.
- 873
- 874

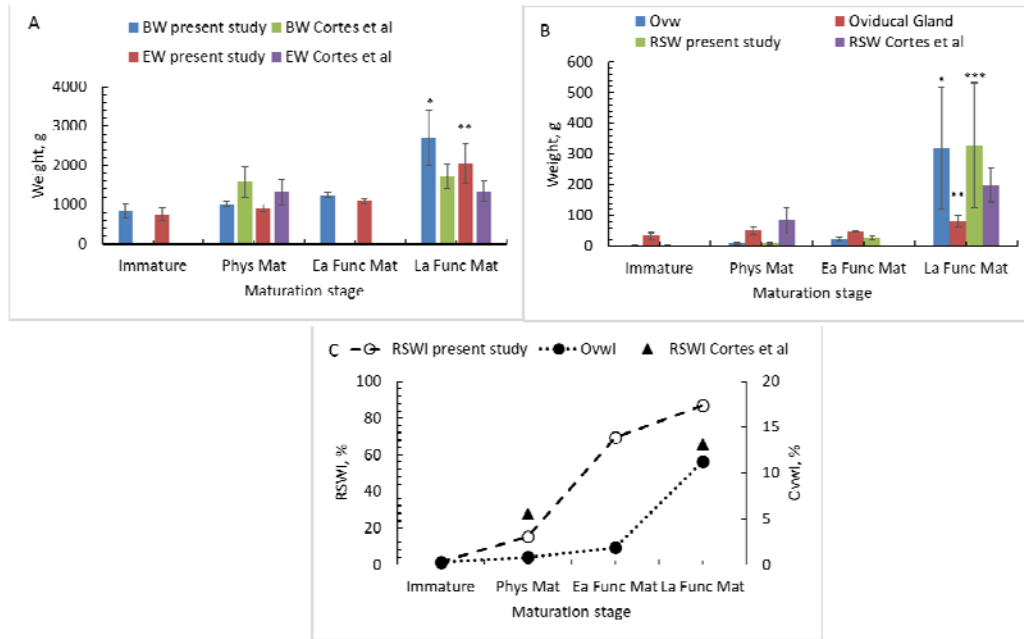

875

876 Fig. 1. Total, eviscerated (A), reproductive tract (B), and gonadosomatic and  
 877 and reproductive system indices (C) of *O. mimus* females along the maturation  
 878 stages obtained in the present study and by Cortes et al. (1995). Physiological  
 879 maturity (Phys Mat) was obtained from females with a OvwI < 2 and in stage III  
 880 of oocytes development. Early functional maturation stage (Ea Func Mat), was  
 881 recognized from females with eggs in the reproductive coelom and with OvwI >  
 882 2. Late functional maturation stage (La Func Mat), was obtained from females  
 883 close to spawn (Arkhipkin, 1992; Avila-Poveda *et al.*, 2016; Olivares *et al.*,  
 884 2017). RSWI = reproductive system index; OvwI = ovarium Index.

885

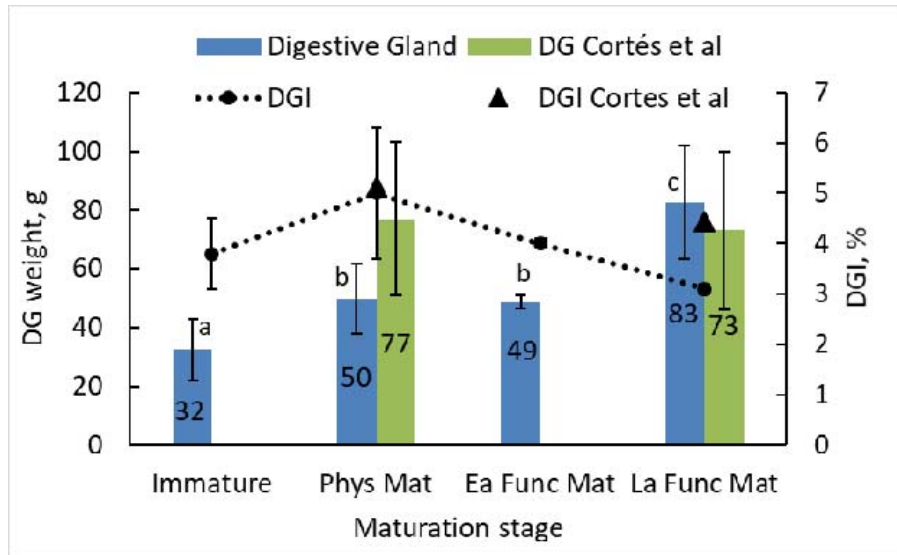

886

887 Fig. 2. Digestive gland weight (DG, g) and digestive gland index (DGI, %) of *O.*  
888 *mimus* females along the maturation stages obtained in the present study and  
889 by Cortés et al. (1995). Physiological maturity (Phys Mat) was obtained from  
890 females with a IGS < 2 and in stage III of oocytes development. Early functional  
891 maturation stage (Ea Func Mat), was recognized from females with eggs in the  
892 reproductive coelom and with Ovwl > 2. Late functional maturation stage (La  
893 Func Mat), was obtained from females close to spawn (Arkhipkin, 1992; Avila-  
894 Poveda, et al., 2016; Olivares, et al., 2017)

895

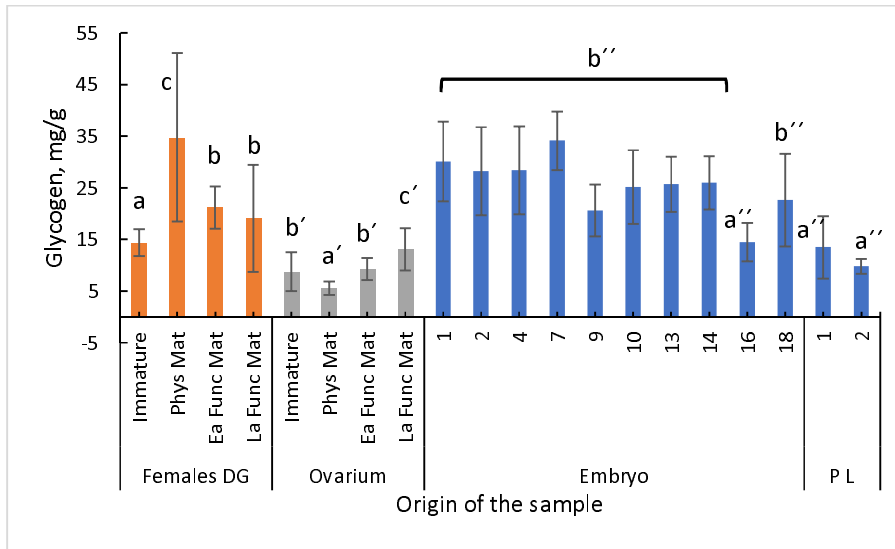

896

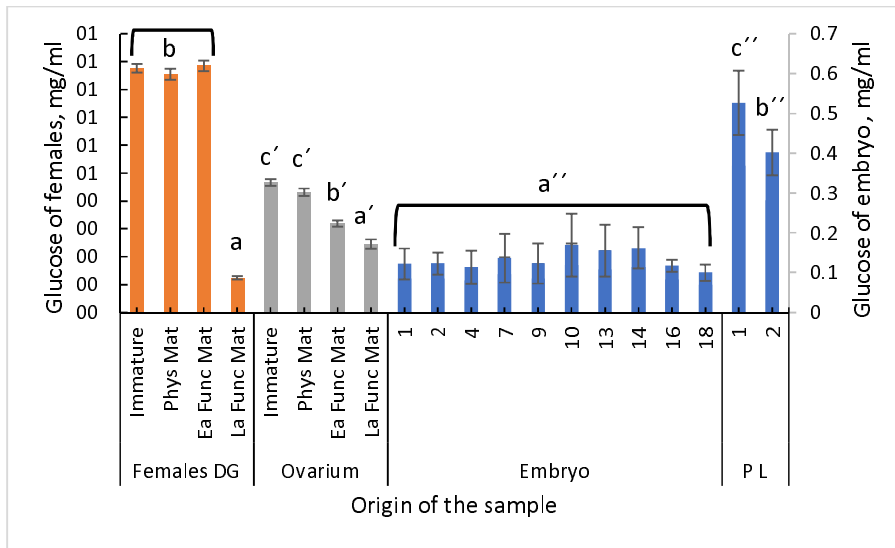

897

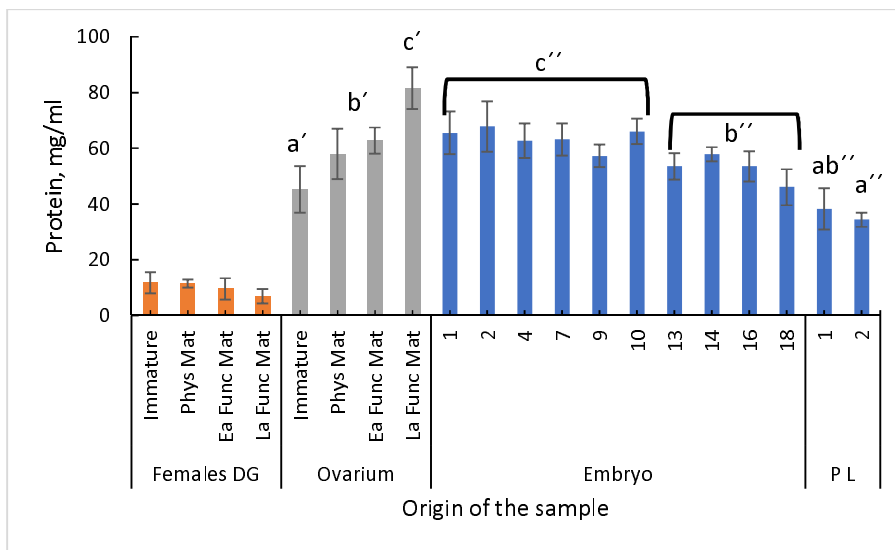

898

899 Fig. 3. Glycogen, glucose and protein of *O. mimos* females (digestive gland:  
900 DG) and ovarium), embryos and paralarvae (PL) maintained in laboratory  
901 conditions at 16°C. Values as mean  $\pm$  SD. Different letters indicate statistical  
902 differences at  $P < 0.05$  level.

903

904

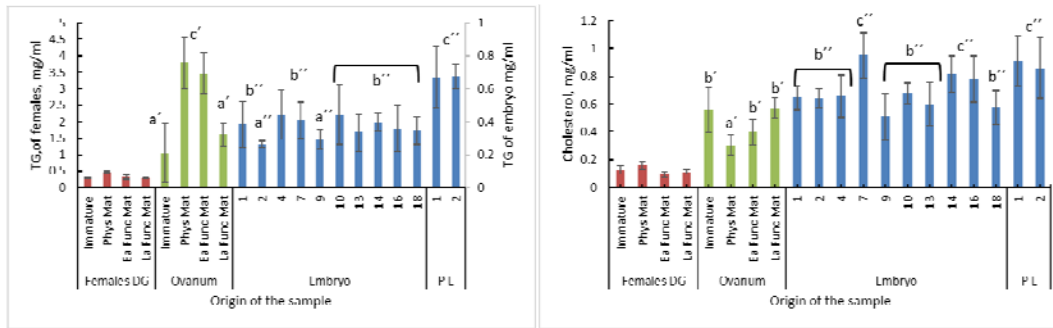

905

906 Fig. 4. Triacyl glycerol and cholesterol of *O. mimus* females (digestive gland:  
907 DG) and ovarium), embryos and paralarvae (PL) maintained in laboratory  
908 conditions at 16°C. Values as mean  $\pm$  SD. Different letters indicate statistical  
909 differences at P < 0. 05 level.

910



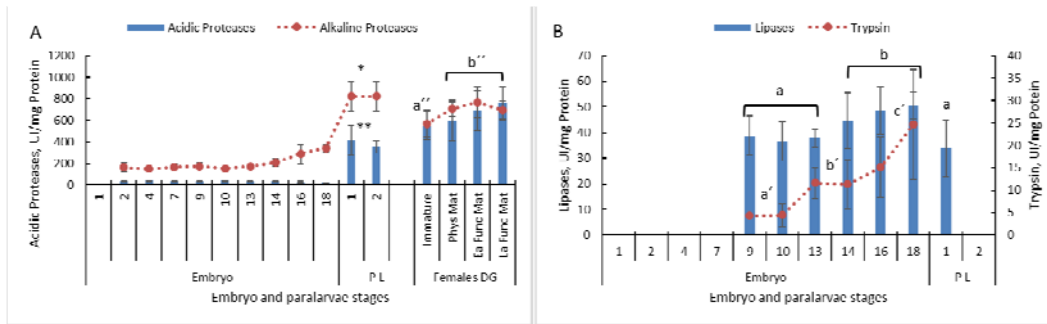

911

912 Fig. 5. Digestive enzymes activity in entire embryos, paralarvae (PL) and in the  
913 digestive gland of *O. mimus* females obtained in animals maintained in  
914 laboratory conditions at 16°C. Values as mean  $\pm$  SD. Different letters or asterisk  
915 indicate statistical differences at P < 0.05 level.

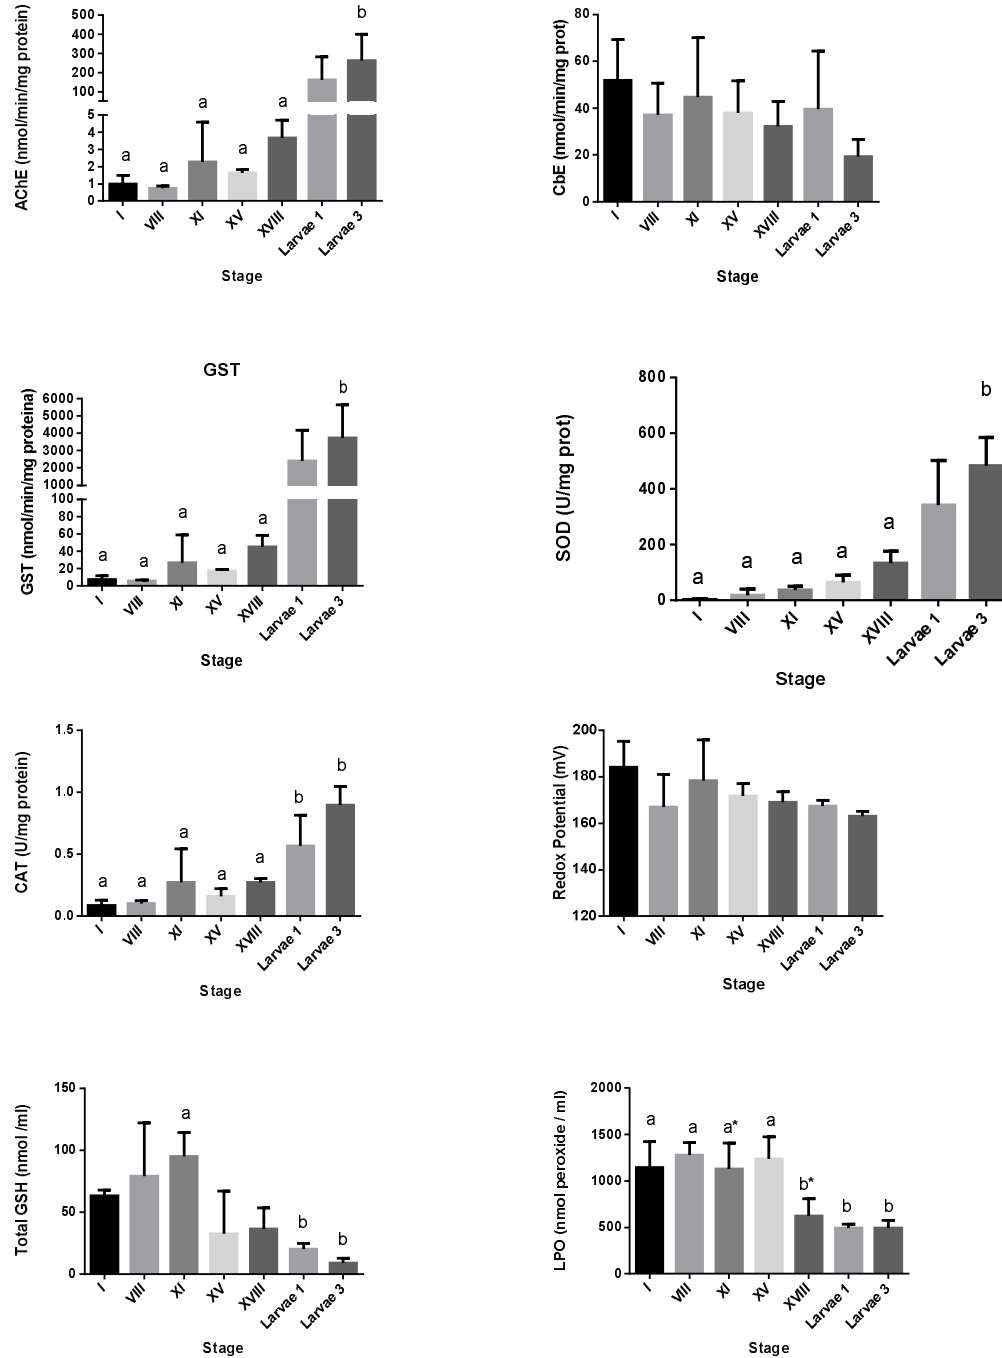

916

917 Fig. 6. Antioxidant defence mechanisms and acetyl cholinesterase activity of  
 918 embryos and paralarvae of *O. mimus* obtained in laboratory conditions at 16°C.  
 919 Values as mean  $\pm$  SD. Different letters means statistical differences between  
 920 treatments at  $p < 0.05$  level.

921

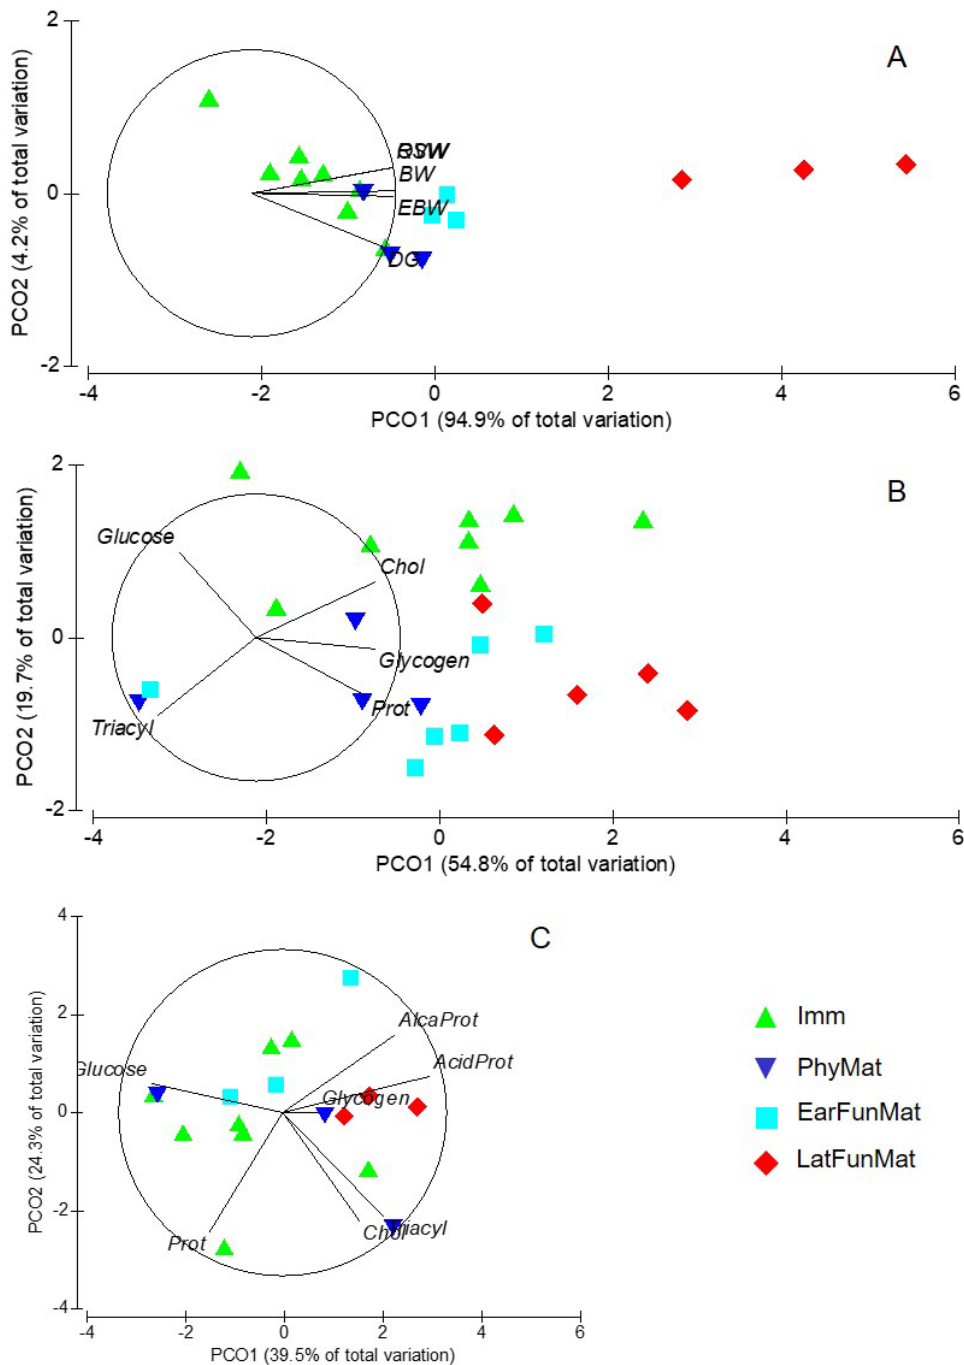

922

923 Fig. 7. Principal coordinate analysis (PCO) of females of *O. mimus* during  
 924 ovarian maturation. A. Body weight characteristics (Total body weight: BW;  
 925 Eviscerated weight: EBW; reproductive tract weight: RTW; Digestive gland  
 926 weight: DG). B. ovarian metabolites (Chol: Cholesterol; Prot: protein; Triacyl:  
 927 triacyl glycerol). C. Digestive gland metabolites and digestive enzymes (Chol:  
 928 Cholesterol; Prot: protein; Triacyl: triacyl glycerol; Alca prot: Alkaline proteases;  
 929 Acid Prot: Acidic Proteases). Measures made in immature (imm), physiological  
 930 maturity (PhyMat), early functional maturity (EarFunMat) and late functional  
 931 maturity (LatFunMat).  
 932

933

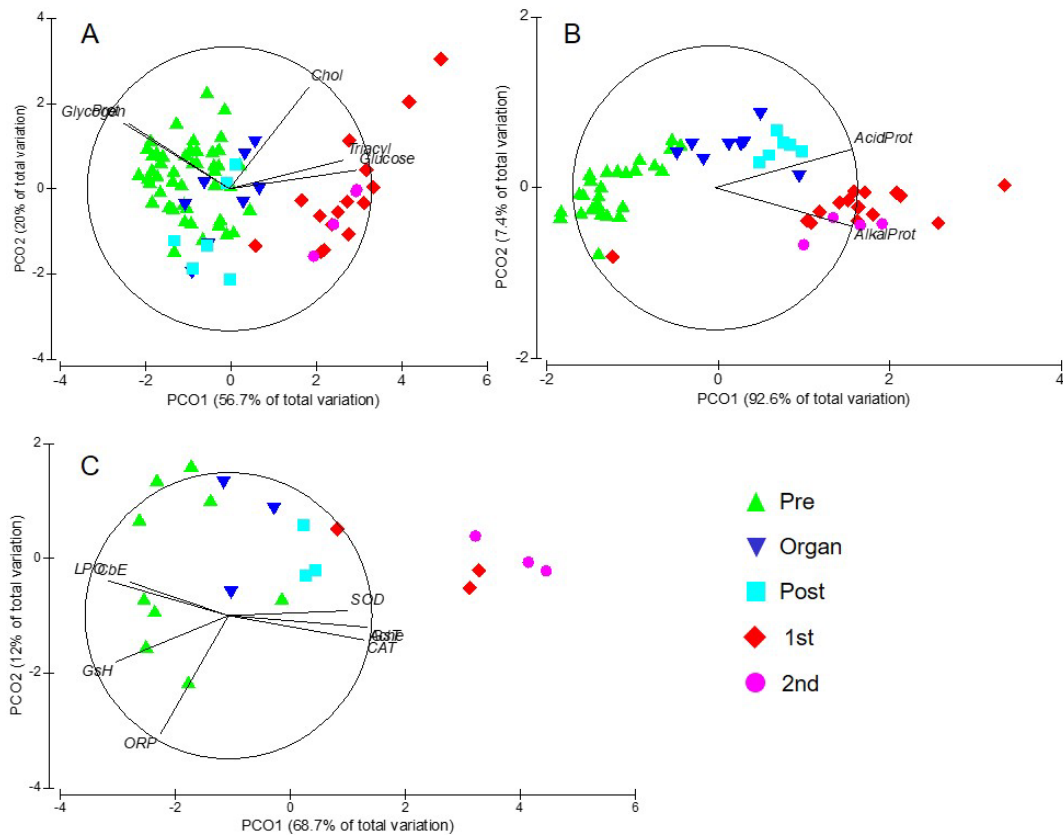

934

935 Fig. 8. Principal coordinate analysis (PCO) of *O. mimus* embryo metabolites (A),  
936 digestive enzymes (B) and antioxidant defence mechanisms (C) measured  
937 along development. Pre = Organogenesis: stages I to XII; Organ = The end of  
938 organogenesis: stages XIV to XVI; Post = Post organogenesis: stages XVII to  
939 XIX; 1 d old Paralarvae: 1<sup>st</sup>; 2 d old paralarvae: 2<sup>nd</sup>.  
940

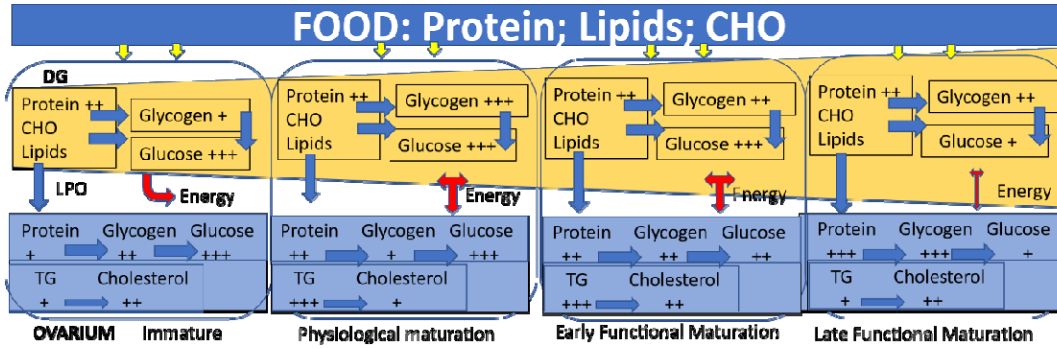

941

942 Fig. 9. Physiological processes that occurs in digestive gland and ovary during *O. mimus* female maturation. Nutrients, coming from the ingested food  
 943 are processed into the digestive gland (DG) where proteins are used along  
 944 maturation both as a source of carbohydrates via gluconeogenic pathway and  
 945 to be transported as peptides and amino acids to internal tissues. Ingested  
 946 carbohydrates (CHO) and glucose liberated from glycogen are used mainly as a  
 947 source of energy into the DG and other tissues at the beginning of maturation  
 948 and until the vitellogenesis start (early functional maturation) (Gallardo et al.,  
 949 2017). In ovary, protein and glycogen follow the same process than DG,  
 950 supporting the glucose production until early functional maturation stage. Lipids  
 951 (measured as triacyl glycerides: TG) and free cholesterol are absorbed in DG  
 952 and transported by lipoproteins (LP) to ovary, between other tissues (Heras &  
 953 Pollero, 1990; Heras & Pollero, 1992). TG are accumulated during  
 954 physiological maturation and early functional maturation and presumably  
 955 converted at least in part, as cholesterol at the end of the maturation process  
 956 (Estefanell et al., 2017).

958

959

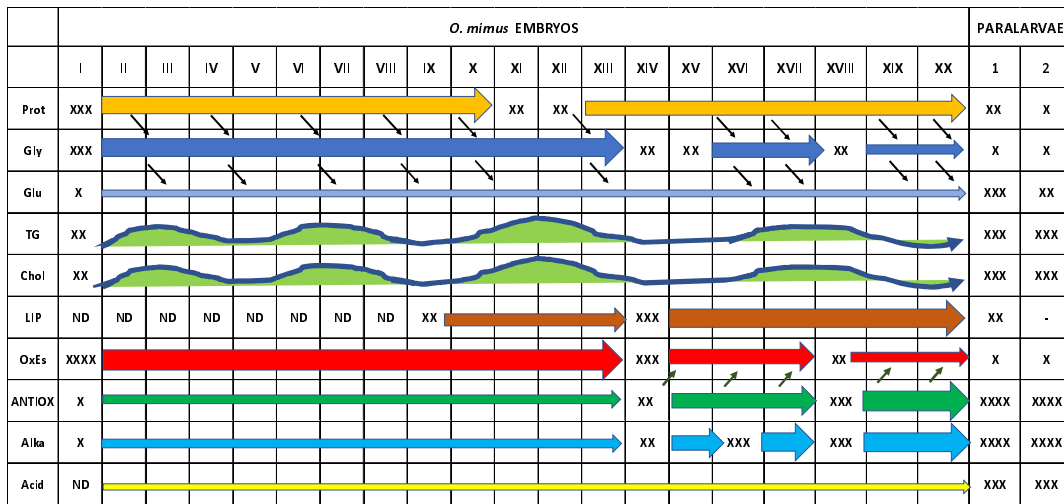

960

961 Fig. 10. *O. mimus* biochemical and physiological dynamics through embryo  
 962 development and after hatch. Gly: glycogen; Glu: glucose; Prot: soluble protein;  
 963 TG: triacyl glycerides; Chol: Cholesterol; Alka: Alkaline enzymes; Acid:  
 964 Acidic Enzymes; LIP: Lipases; OxEs: Oxidative stress; ANTIOX: Antioxidant defence  
 965 mechanisms. Arrows indicate the possible metabolic pathway that are carried  
 966 out into the embryos. Soluble proteins support the glycogen production via  
 967 gluconeogenic pathways, while glycogen liberate glucose in a stable and  
 968 permanent form through embryo development to maintain a stable and efficient  
 969 metabolizable energy supply. Coming from the yolk, TG and Cholesterol are  
 970 used in pulses while lipases activity was evident from the stage X onwards,  
 971 when the organogenesis starts. At the beginning of the embryo development  
 972 high levels of oxidative stress were observed, probably from residual ROS  
 973 produced in the female ovary. *O. mimus* embryos were able to start the  
 974 elimination of ROS when they reached the stage XIV, when the activity of the  
 975 antioxidant defence mechanisms started activities. Activities of alkaline and  
 976 acidic digestive enzymes were evident at the end of embryo development and  
 977 in hatchlings, when presumably the digestive gland is in preparation to ingest  
 978 food.

979

980

981

982

983

984

985

986

987 Table 1. Results of one-way permutational multiple MANOVAs applied on six  
 988 multivariate sets of data obtained from *O. mimos*: 1) female reproductive  
 989 condition; 2) metabolite concentration in female ovaries; 3) metabolite  
 990 concentration and enzyme activity in the digestive gland of female; 4)  
 991 metabolite concentration; 5) enzyme activity; and 6) antioxidant defence  
 992 mechanisms in embryos and paralarvae. The degrees of freedom (df),  
 993 multivariate sum of squares (SS), mean square (MS), pseudo-*F* and *p*-values,  
 994 and the number of unique permutations is given for each test.

995

| Source of variation                                                 | Df | SS     | MS    | pseudo- <i>F</i> | <i>p</i> | Unique permutations |
|---------------------------------------------------------------------|----|--------|-------|------------------|----------|---------------------|
| <b>1. Female reproductive condition</b>                             |    |        |       |                  |          |                     |
| Stage                                                               | 3  | 70.60  | 23.53 | 32.54            | < 0.001  | 9949                |
| Residuals                                                           | 13 | 9.40   | 0.72  |                  |          |                     |
| <b>2. Metabolites in female ovaries</b>                             |    |        |       |                  |          |                     |
| Stage                                                               | 3  | 39.66  | 13.22 | 3.57             | < 0.01   | 9945                |
| Residuals                                                           | 19 | 70.34  | 3.70  |                  |          |                     |
| <b>3. Metabolites and enzyme activity in female digestive gland</b> |    |        |       |                  |          |                     |
| Stage                                                               | 3  | 35.52  | 11.84 | 2.01             | < 0.05   | 9931                |
| Residuals                                                           | 13 | 76.48  | 5.88  |                  |          |                     |
| <b>4. Metabolites in embryos and paralarvae</b>                     |    |        |       |                  |          |                     |
| Stage                                                               | 4  | 202.95 | 50.74 | 19.81            | < 0.001  | 9927                |
| Residuals                                                           | 75 | 192.05 | 2.56  |                  |          |                     |
| <b>5. Enzyme activity in embryos and paralarvae</b>                 |    |        |       |                  |          |                     |
| Stage                                                               | 4  | 96.88  | 24.22 | 58.66            | < 0.001  | 9944                |
| Residuals                                                           | 56 | 23.12  | 0.41  |                  |          |                     |
| <b>6. Antioxidant defence mechanisms in embryos and paralarvae</b>  |    |        |       |                  |          |                     |
| Stage                                                               | 4  | 110.8  | 27.7  | 9.01             | < 0.001  | 9944                |
| Residuals                                                           | 16 | 49.20  | 3.08  |                  |          |                     |

996



997 Table 2. Results of permutational paired t-tests that compared centroids  
 998 representing data in six multivariate sets of data obtained from female *O. mimus*  
 999 in different stages of gonadic maturation (Imm: immature, PhyMat: physiological  
 1000 maturity, EarFuncMat: early functional maturity, and LatFuncMat: late functional  
 1001 maturity), and from embryos and paralarvae in different stage of development  
 1002 (Pre, Organ and Post: stages before, during, and after organogenesis,  
 1003 respectively, and 1st and 2nd paralarvae). Values are permutational *p*-values  
 1004 for each test.

| <b>1. Female reproductive condition</b>                    |         |         |            |       |
|------------------------------------------------------------|---------|---------|------------|-------|
|                                                            | Imm     | PhyMat  | EarFuncMat |       |
| PhyMat                                                     | 0.053   | -       | -          |       |
| EarFuncMat                                                 | < 0.05  | 0.102   | -          |       |
| LatFuncMat                                                 | < 0.01  | 0.100   | 0.100      |       |
| <b>2. Metabolites in female ovaries</b>                    |         |         |            |       |
|                                                            | Imm     | PhyMat  | EarFuncMat |       |
| PhyMat                                                     | < 0.05  | -       | -          |       |
| EarFuncMat                                                 | < 0.05  | 0.351   | -          |       |
| LatFuncMat                                                 | < 0.01  | < 0.05  | < 0.05     |       |
| <b>3. Metabolites in female digestive gland</b>            |         |         |            |       |
|                                                            | Imm     | PhyMat  | EarFuncMat |       |
| PhyMat                                                     | 0.225   | -       | -          |       |
| EarFuncMat                                                 | 0.271   | 0.498   | -          |       |
| LatFuncMat                                                 | < 0.01  | 0.204   | 0.104      |       |
| <b>4. Metabolites in embryos and paralarvae</b>            |         |         |            |       |
|                                                            | Pre     | Organ   | Post       | 1st   |
| Organ                                                      | < 0.01  | -       | -          | -     |
| Post                                                       | < 0.001 | 0.161   | -          | -     |
| 1st                                                        | < 0.001 | < 0.001 | < 0.001    | -     |
| 2nd                                                        | < 0.001 | < 0.01  | < 0.01     | 0.567 |
| <b>5. Enzyme activity in embryos and paralarvae</b>        |         |         |            |       |
|                                                            | Pre     | Organ   | Post       | 1st   |
| Organ                                                      | < 0.001 | -       | -          | -     |
| Post                                                       | < 0.001 | < 0.05  | -          | -     |
| 1st                                                        | < 0.001 | < 0.001 | < 0.01     | -     |
| 2nd                                                        | < 0.001 | < 0.01  | < 0.01     | 0.617 |
| <b>6. Antioxidant mechanisms in embryos and paralarvae</b> |         |         |            |       |
|                                                            | Pre     | Organ   | Post       | 1st   |
| Organ                                                      | 0.125   | -       | -          | -     |
| Post                                                       | < 0.01  | 0.098   | -          | -     |
| 1st                                                        | < 0.01  | 0.097   | 0.098      | -     |
| 2nd                                                        | < 0.01  | 0.099   | 0.096      | 0.299 |

1005
